# Supplementary material
Source: PubMed Central journal article supplement (PMC4228987)
Supplement: NIHMS559952-supplement-300536R4_Online_Supplement.pdf [file NIHMS559952-supplement-300536R4_Online_Supplement.pdf]

**Supp. Table I: Molecules regulating Akt activity and cardiac functions.**

| <b>Molecules</b>                                                                                    | <b>Action</b>                                                                                                                    | <b>Cardiovascular functions</b>                                                                                                                                                                                        | <b>Refs</b> |
|-----------------------------------------------------------------------------------------------------|----------------------------------------------------------------------------------------------------------------------------------|------------------------------------------------------------------------------------------------------------------------------------------------------------------------------------------------------------------------|-------------|
| PI (3,4,5) P3-dependent protein kinase-1 (PDK1)                                                     | PDK1 phosphorylates Akt at T308 residue and increases its activity.                                                              | PDK1 deficiency induces heart failure in mice due to reduced cardiomyocyte size, cardiac muscle mass and increased sensitivity of cardiomyocytes to hypoxia.                                                           | 1-3         |
| Mammalian target of rapamycin Complex 2 (mTORC2)                                                    | mTORC2 phosphorylates Akt at S473 residue and enhances its catalytic activity.                                                   | mTORC2 mediates pro-survival signaling in adult cardiomyocytes.                                                                                                                                                        | 4, 5        |
| Inositol hexakisphosphate kinase 1 (IP6K1)                                                          | IP6K1 produces diphosphoinositol pentakisphosphate which competes with Akt PH domain for binding to PIP3.                        | Inhibition of IP6Ks enhances Akt activity in mesenchymal stem cells to improve their therapeutic efficacy for treating myocardial infarction.                                                                          | 6, 7        |
| Inositol polyphosphate multikinase (IPKs)                                                           | IPK physiologically generates PIP3 to activate Akt.                                                                              | Expresses mostly in the developing heart. Homozygous IPK2-null mice are smaller than normal controls, and they die embryonically during E9.5–E10.                                                                      | 8, 9        |
| PTEN                                                                                                | PTEN negatively regulates intracellular levels of PIP3 and thereby inhibits Akt activity.                                        | Muscle-specific deletion of PTEN induces basal cardiac hypertrophy, accompanied with mild reduction in LV systolic function. However, cardiac specific deletion of PTEN protects mice from post MI cardiac remodeling. | 10-14       |
| SH2 domain-containing inositol 5'-phosphatases (SHIP); Inositol polyphosphate-5-phosphatase (INPP5) | Inositol 5- phosphatases hydrolyze PI (3,4,5) P3 and thereby negatively regulates the growth factor-mediated activation of Akt.  | INPP5f knockout mice exhibit exaggerated hypertrophy with reactivation of the fetal genes during cardiac stress.                                                                                                       | 15-18       |
| PH domain leucine-rich repeat protein phosphatases (PHLPP-1 and -2)                                 | PHLPP protein phosphatases inhibit Akt by dephosphorylating it at S473 residue.                                                  | PHLPP-1 knockout cardiomyocytes show increased survival during ischemia/ reperfusion injury due to increased activity of Akt.                                                                                          | 19-23       |
| Protein kinase C-related kinase 2 (PRK2)                                                            | PRK2 directly binds and inhibits Akt by preventing phosphorylation at T308 and S473 residues.                                    | The functional role of PRK2 in the heart is not known.                                                                                                                                                                 | 24          |
| Protein phosphatase 2A (PP2A)                                                                       | PP2A dephosphorylates Akt at T308 residue.                                                                                       | PP2A hyper activation leads to contractile dysfunction in the heart                                                                                                                                                    | 25-28       |
| PHLDA3                                                                                              | PHLDA3, the PH domain-only protein, directly interferes with binding of membrane lipids to Akt, thereby inhibiting Akt activity. | Not studied in cardiomyocytes.                                                                                                                                                                                         | 29          |

|                                                                   |                                                                                                                                                                   |                                                                                                                                                                             |        |
|-------------------------------------------------------------------|-------------------------------------------------------------------------------------------------------------------------------------------------------------------|-----------------------------------------------------------------------------------------------------------------------------------------------------------------------------|--------|
| TCL1                                                              | TCL1 oncogene binds to the PH domain of Akt, promotes nuclear transport, and enhances its kinase activity.                                                        | Not studied in cardiomyocytes                                                                                                                                               | 30, 31 |
| Zyxin                                                             | Zyxin, a cytoskeletal LIM-domain protein targets Akt into the nucleus and promotes Akt activity.                                                                  | Zyxin promotes cardiomyocyte survival.                                                                                                                                      | 32, 33 |
| Carboxyl-terminal modulator protein (CTMP)                        | CTMP binds to the carboxyl-terminal of Akt at the plasma membrane and inhibits phosphorylation of Akt at T308 and S473.                                           | Not studied in cardiomyocytes.                                                                                                                                              | 34, 35 |
| TRAF6 E3 Ligase                                                   | TRAF6-mediated lysine-63 ubiquitination of the PH domain promotes Akt membrane recruitment, and phosphorylation upon growth-factor stimulation of cells.          | Muscle specific deletion of TRAF6 inhibits skeletal muscle wasting in mice. Endothelial deficiency of TRAF6 attenuated the development of atherosclerosis in a mouse model. | 36-38  |
| Skp2-SCF E3 ligase                                                | Skp2-SCF E3 ligase poly-ubiquitinates Akt to promote membrane recruitment in response to EGF stimulation of cells.                                                | Not studied in cardiomyocytes                                                                                                                                               | 39     |
| NEDD4-1 E3 ligase                                                 | Controls lysine-63 ubiquitin-dependent trafficking of phosphorylated AKT to perinuclear region, where it is released into cytoplasm or imported into the nucleus. | Not studied in cardiomyocytes                                                                                                                                               | 40     |
| Tetratricopeptide repeat domain 3 (TTC3) E3 ligase                | TTC3 binds to phosphorylated Akt, facilitates its ubiquitination and degradation within the nucleus.                                                              | Not studied in cardiomyocytes                                                                                                                                               | 41     |
| Poly(ADP-ribose) polymerase-1 (PARP1)                             | Inhibition of PARP-1 increases Akt phosphorylation.                                                                                                               | PARP-1 deficiency protects mice from angiotensin II-induced cardiac hypertrophy, ischemia reperfusion injury and diabetic cardiomyopathy.                                   | 42-47  |
| BSD domain-containing signal transducer and Akt interactor (BSTA) | BSTA-Akt1 interaction promotes the mTORC2 - Akt1 association and phosphorylation of Akt1 at S473 during growth factor stimulation.                                | Not studied in cardiomyocytes                                                                                                                                               | 48     |
| Cylindromatosis factor (CYLD)                                     | Deubiquitination of Akt by CYLD suppresses growth factor-mediated ubiquitination, membrane recruitment and activation.                                            | CYLD activation inhibits inflammation and proliferation of vascular cells                                                                                                   | 49, 50 |
| SIRT1                                                             | SIRT1 mediated deacetylation promotes Akt-PIP3 binding, membrane recruitment, and phosphorylation upon growth-factor stimulation.                                 | Chronic SIRT1 activation induces cardiac hypertrophy and heart failure in mouse models. However, short term activation protects the heart from ischemia reperfusion injury. | 51-54  |
| SIRT2                                                             | SIRT2-mediated deacetylation of Akt                                                                                                                               | SIRT2 depletion reduces TNF $\alpha$                                                                                                                                        |        |

|              |                                                                                                                                         |                                                                                                                                              |        |
|--------------|-----------------------------------------------------------------------------------------------------------------------------------------|----------------------------------------------------------------------------------------------------------------------------------------------|--------|
|              | promotes its phosphorylation.                                                                                                           | stimulated necrosis, thus reduces ischemia reperfusion injury in the mouse heart.                                                            | 55, 56 |
| O-GlcNAcase  | O-GlcNAcylation of Akt disrupts its interaction with PDK1, thereby inhibiting Akt phosphorylation at T308 residue.                      | O-GlcNAcase activation improves contractile function of the diabetic heart.                                                                  | 57-61  |
| Glutaredoxin | Glutaredoxin, a protein disulfide oxidoreductase reduces oxidative modification of Akt, thereby maintaining Akt phosphorylation status. | Glutaredoxin activation protects the heart from adverse ventricular remodeling induced by chronic MI and doxorubicin-induced cardiotoxicity. | 62-65  |

#### References:

1. Alessi DR, James SR, Downes CP, Holmes AB, Gaffney PRJ, Reese CB, Cohen P. Characterization of a 3-phosphoinositide-dependent protein kinase which phosphorylates and activates protein kinase b alpha. *Current Biology*. 1997;7:261-269
2. Alessi DR, Deak M, Casamayor A, Caudwell FB, Morrice N, Norman DG, Gaffney P, Reese CB, MacDougall CN, Harbison D, Ashworth A, Bownes M. 3-phosphoinositide-dependent protein kinase-1 (pdk1): Structural and functional homology with the drosophila dstpk61 kinase. *Current Biology*. 1997;7:776-789
3. Mora A, Davies AM, Bertrand L, Sharif I, Budas GR, Jovanovic S, Mouton V, Kahn CR, Lucocq JM, Gray GA, Jovanovic A, Alessi DR. Deficiency of pdk1 in cardiac muscle results in heart failure and increased sensitivity to hypoxia. *Embo Journal*. 2003;22:4666-4676
4. Sarbassov DD, Guertin DA, Ali SM, Sabatini DM. Phosphorylation and regulation of akt/pkb by the rictor-mtor complex. *Science*. 2005;307:1098-1101
5. Moschella PC, McKillop J, Pleasant DL, Harston RK, Balasubramanian S, Kuppaswamy D. Mtor complex 2 mediates akt phosphorylation that requires pkcepsilon in adult cardiac muscle cells. *Cellular signalling*. 2013
6. Prasad A, Jia Y, Chakraborty A, Li Y, Jain SK, Zhong J, Roy SG, Loison F, Mondal S, Sakai J, Blanchard C, Snyder SH, Luo HR. Inositol hexakisphosphate kinase 1 regulates neutrophil function in innate immunity by inhibiting phosphatidylinositol-(3,4,5)-trisphosphate signaling. *Nature immunology*. 2011;12:752-760
7. Cao F, Zhang Z, Sun DD, Wang HC. Inositol hexakisphosphate kinases' ( ip6ks) selective inhibition enhances mesenchymal stem cells engraftment and improves therapeutic efficacy for myocardial infarction. *J Am Coll Cardiol*. 2013;61:E25-E25
8. Maag D, Maxwell MJ, Hardesty DA, Boucher KL, Choudhari N, Hanno AG, Ma JF, Snowman AS, Pietropaoli JW, Xu RS, Storm PB, Saiardi A, Snyder SH, Resnick AC. Inositol polyphosphate multikinase is a physiologic pi3-kinase that activates akt/pkb. *Proceedings of the National Academy of Sciences of the United States of America*. 2011;108:1391-1396
9. Saiardi A, Nagata E, Luo HBR, Sawa A, Luo XJ, Snowman AM, Snyder SH. Mammalian inositol polyphosphate multikinase synthesizes inositol 1,4,5-trisphosphate and an inositol pyrophosphate. *Proceedings of the National Academy of Sciences of the United States of America*. 2001;98:2306-2311
10. Li J, Yen C, Liaw D, Podsypanina K, Bose S, Wang SI, Puc J, Miliaresis C, Rodgers L, McCombie R, Bigner SH, Giovanella BC, Ittmann M, Tycko B, Hibshoosh H, Wigler MH, Parsons R. Pten, a

- putative protein tyrosine phosphatase gene mutated in human brain, breast, and prostate cancer. *Science*. 1997;275:1943-1947
11. Hyun T, Yam A, Pece S, Xie XZ, Zhang J, Miki T, Gutkind JS, Li WQ. Loss of pten expression leading to high akt activation in human multiple myelomas. *Blood*. 2000;96:3560-3568
  12. Maehama T, Dixon JE. The tumor suppressor, pten/mmac1, dephosphorylates the lipid second messenger, phosphatidylinositol 3,4,5-trisphosphate. *Journal of Biological Chemistry*. 1998;273:13375-13378
  13. Oudit GY, Kassiri Z, Zhou J, Liu QC, Liu PP, Backx PH, Dawood F, Crackower MA, Scholey JW, Penninger JM. Loss of pten attenuates the development of pathological hypertrophy and heart failure in response to biomechanical stress. *Cardiovascular research*. 2008;78:505-514
  14. Ruan HM, Li J, Ren SR, Gao J, Li GP, Kim R, Wu H, Wang YB. Inducible and cardiac specific pten inactivation protects ischemia/reperfusion injury. *Journal of molecular and cellular cardiology*. 2009;46:193-200
  15. Liu QR, Sasaki T, Kozieradzki I, Wakeham A, Itie A, Dumont DJ, Penninger JM. Ship is a negative regulator of growth factor receptor-mediated pkb/akt activation and myeloid cell survival. *Genes & development*. 1999;13:786-791
  16. Helgason CD, Damen JE, Rosten P, Grewal R, Sorensen P, Chappel SM, Borowski A, Jirik F, Krystal G, Humphries RK. Targeted disruption of ship leads to hemopoietic perturbations lung pathology, and a shortened life span. *Genes & development*. 1998;12:1610-1620
  17. Zhang J, Liu ZA, Rasschaert J, Blero D, Deneubourg L, Schurmans S, Erneux C, Pesesse X. Ship2 controls ptdins(3,4,5)p-3 levels and pkb activity in response to oxidative stress. *Cellular signalling*. 2007;19:2194-2200
  18. Zhu WT, Trivedi CM, Zhou D, Yuan LJ, Lu MM, Epstein JA. Inpp5f is a polyphosphoinositide phosphatase that regulates cardiac hypertrophic responsiveness. *Circ Res*. 2009;105:1240-+
  19. Miyamoto S, Purcell NH, Smith JM, Gao T, Whittaker R, Huang K, Castillo R, Glembotski CC, Sussman MA, Newton AC, Brown JH. Phlpp-1 negatively regulates akt activity and survival in the heart. *Circ Res*. 2010;107:476-484
  20. Aviv Y, Kirshenbaum LA. Novel phosphatase phlpp-1 regulates mitochondrial akt activity and cardiac cell survival. *Circ Res*. 2010;107:448-450
  21. Chen MH, Pratt CP, Zeeman ME, Schultz N, Taylor BS, O'Neill A, Castillo-Martin M, Nowak DG, Naguib A, Grace DM, Murn J, Navin N, Atwal GS, Sander C, Gerald WL, Cordon-Cardo C, Newton AC, Carver BS, Trotman LC. Identification of phlpp1 as a tumor suppressor reveals the role of feedback activation in pten-mutant prostate cancer progression. *Cancer cell*. 2011;20:173-186
  22. Brognard J, Sierrecki E, Gao T, Newton AC. Phlpp and a second isoform, phlpp2, differentially attenuate the amplitude of akt signaling by regulating distinct akt isoforms. *Molecular cell*. 2007;25:917-931
  23. Gao TY, Furnari F, Newton AC. Phlpp: A phosphatase that directly dephosphorylates akt, promotes apoptosis, and suppresses tumor growth. *Molecular cell*. 2005;18:13-24
  24. Koh H, Lee KH, Kim D, Kim S, Kim JW, Chung J. Inhibition of akt and its anti-apoptotic activities by tumor necrosis factor-induced protein kinase c-related kinase 2 (prk2) cleavage. *Journal of Biological Chemistry*. 2000;275:34451-34458
  25. Resjo S, Goransson O, Harndahl L, Zolnierowicz S, Manganiello V, Degerman E. Protein phosphatase 2a is the main phosphatase involved in the regulation of protein kinase b in rat adipocytes. *Cellular signalling*. 2002;14:231-238
  26. Meier R, Thelen M, Hemmings BA. Inactivation and dephosphorylation of protein kinase balpha (pkbalpha) promoted by hyperosmotic stress. *The EMBO journal*. 1998;17:7294-7303

27. Gergs U, Boknik P, Buchwalow I, Fabritz L, Matus M, Justus I, Hanske G, Schmitz W, Neumann J. Overexpression of the catalytic subunit of protein phosphatase 2a impairs cardiac function. *Journal of Biological Chemistry*. 2004;279:40827-40834
28. Marshall M, Anilkumar N, Layland J, Walker SJ, Kentish JC, Shah AM, Cave AC. Protein phosphatase 2a contributes to the cardiac dysfunction induced by endotoxemia. *Cardiovascular research*. 2009;82:67-76
29. Kawase T, Ohki R, Shibata T, Tsutsumi S, Kamimura N, Inazawa J, Ohta T, Ichikawa H, Aburatani H, Tashiro F, Taya Y. Ph domain-only protein phlda3 is a p53-regulated repressor of akt. *Cell*. 2009;136:535-550
30. Pekarsky Y, Koval A, Hallas C, Bichi R, Tresini M, Malstrom S, Russo G, Tschlis P, Croce CM. Tcl1 enhances akt kinase activity and mediates its nuclear translocation. *Proceedings of the National Academy of Sciences of the United States of America*. 2000;97:3028-3033
31. Auguin D, Barthe P, Royer C, Stern MH, Noguchi M, Arold ST, Roumestand C. Structural basis for the co-activation of protein kinase b by t-cell leukemia-1 (tcl1) family proto-oncoproteins. *Journal of Biological Chemistry*. 2004;279:35890-35902
32. Kato T, Muraski J, Chen Y, Tsujita Y, Wall J, Glembotski CC, Schaefer E, Beckerle M, Sussman MA. Atrial natriuretic peptide promotes cardiomyocyte survival by cgmp-dependent nuclear accumulation of zyxin and akt. *J Clin Invest*. 2005;115:2716-2730
33. Chan CB, Liu X, Tang X, Fu H, Ye K. Akt phosphorylation of zyxin mediates its interaction with acinus-s and prevents acinus-triggered chromatin condensation. *Cell death and differentiation*. 2007;14:1688-1699
34. Maira SM, Galetic I, Brazil DP, Kaech S, Ingley E, Thelen M, Hemmings BA. Carboxyl-terminal modulator protein (ctmp), a negative regulator of pkb/akt and v-akt at the plasma membrane. *Science*. 2001;294:374-380
35. Miyawaki T, Ofengeim D, Noh KM, Latuszek-Barrantes A, Hemmings BA, Follenzi A, Zukin RS. The endogenous inhibitor of akt, ctmp, is critical to ischemia-induced neuronal death. *Nat Neurosci*. 2009;12:618-626
36. Yang WL, Wang J, Chan CH, Lee SW, Campos AD, Lamothe B, Hur L, Grabiner BC, Lin X, Darnay BG, Lin HK. The e3 ligase traf6 regulates akt ubiquitination and activation. *Science*. 2009;325:1134-1138
37. Polykratis A, van Loo G, Xanthoulea S, Hellmich M, Pasparakis M. Conditional targeting of tumor necrosis factor receptor-associated factor 6 reveals opposing functions of toll-like receptor signaling in endothelial and myeloid cells in a mouse model of atherosclerosis. *Circulation*. 2012;126:1739-1751
38. Paul PK, Gupta SK, Bhatnagar S, Panguluri SK, Darnay BG, Choi Y, Kumar A. Targeted ablation of traf6 inhibits skeletal muscle wasting in mice. *The Journal of cell biology*. 2010;191:1395-1411
39. Chan CH, Li CF, Yang WL, Gao Y, Lee SW, Feng Z, Huang HY, Tsai KK, Flores LG, Shao Y, Hazle JD, Yu D, Wei W, Sarbassov D, Hung MC, Nakayama KI, Lin HK. The skp2-scf e3 ligase regulates akt ubiquitination, glycolysis, herceptin sensitivity, and tumorigenesis. *Cell*. 2012;149:1098-1111
40. Fan CD, Lum MA, Xu C, Black JD, Wang X. Ubiquitin-dependent regulation of phospho-akt dynamics by the ubiquitin e3 ligase, nedd4-1, in the insulin-like growth factor-1 response. *J Biol Chem*. 2013;288:1674-1684
41. Suizu F, Hiramuki Y, Okumura F, Matsuda M, Okumura AJ, Hirata N, Narita M, Kohno T, Yokota J, Bohgaki M, Obuse C, Hatakeyama S, Obata T, Noguchi M. The e3 ligase ttc3 facilitates ubiquitination and degradation of phosphorylated akt. *Developmental cell*. 2009;17:800-810
42. Szanto A, Hellebrand EE, Bogner Z, Tucsek Z, Szabo A, Gallyas F, Jr., Sumegi B, Varbiro G. Parp-1 inhibition-induced activation of pi-3-kinase-akt pathway promotes resistance to taxol. *Biochemical pharmacology*. 2009;77:1348-1357

43. Mathews MT, Berk BC. Parp-1 inhibition prevents oxidative and nitrosative stress-induced endothelial cell death via transactivation of the vegf receptor 2. *Arteriosclerosis, thrombosis, and vascular biology*. 2008;28:711-717
44. Ethier C, Tardif M, Arul L, Poirier GG. Parp-1 modulation of mtor signaling in response to a DNA alkylating agent. *PLoS one*. 2012;7:e47978
45. Pillai JB, Gupta M, Rajamohan SB, Lang R, Raman J, Gupta MP. Poly(adp-ribose) polymerase-1-deficient mice are protected from angiotensin ii-induced cardiac hypertrophy. *American journal of physiology. Heart and circulatory physiology*. 2006;291:H1545-1553
46. Tao R, Kim SH, Honbo N, Karliner JS, Alano CC. Minocycline protects cardiac myocytes against simulated ischemia-reperfusion injury by inhibiting poly(adp-ribose) polymerase-1. *Journal of cardiovascular pharmacology*. 2010;56:659-668
47. Pacher P, Liaudet L, Soriano FG, Mabley JG, Szabo E, Szabo C. The role of poly(adp-ribose) polymerase activation in the development of myocardial and endothelial dysfunction in diabetes. *Diabetes*. 2002;51:514-521
48. Yao Y, Suraokar M, Darnay BG, Hollier BG, Shaiken TE, Asano T, Chen CH, Chang BH, Lu Y, Mills GB, Sarbassov D, Mani SA, Abbruzzese JL, Reddy SA. Bsta promotes mtorc2-mediated phosphorylation of akt1 to suppress expression of foxc2 and stimulate adipocyte differentiation. *Sci Signal*. 2013;6:ra2
49. Yang WL, Jin G, Li CF, Jeong YS, Moten A, Xu D, Feng Z, Chen W, Cai Z, Darnay B, Gu W, Lin HK. Cycles of ubiquitination and deubiquitination critically regulate growth factor-mediated activation of akt signaling. *Sci Signal*. 2013;6:ra3
50. Takami Y, Nakagami H, Morishita R, Katsuya T, Hayashi H, Mori M, Koriyama H, Baba Y, Yasuda O, Rakugi H, Ogihara T, Kaneda Y. Potential role of cyld (cylindromatosis) as a deubiquitinating enzyme in vascular cells. *American Journal of Pathology*. 2008;172:818-829
51. Sundaresan NR, Pillai VB, Wolfgeher D, Samant S, Vasudevan P, Parekh V, Raghuraman H, Cunningham JM, Gupta M, Gupta MP. The deacetylase sirt1 promotes membrane localization and activation of akt and pdk1 during tumorigenesis and cardiac hypertrophy. *Science signaling*. 2011;4:ra46
52. Alcendor RR, Gao S, Zhai P, Zablocki D, Holle E, Yu X, Tian B, Wagner T, Vatner SF, Sadoshima J. Sirt1 regulates aging and resistance to oxidative stress in the heart. *Circulation research*. 2007;100:1512-1521
53. Oka S, Alcendor R, Zhai P, Park JY, Shao D, Cho J, Yamamoto T, Tian B, Sadoshima J. Pparalpha-sirt1 complex mediates cardiac hypertrophy and failure through suppression of the err transcriptional pathway. *Cell metabolism*. 2011;14:598-611
54. Kawashima T, Inuzuka Y, Okuda J, Kato T, Niizuma S, Tamaki Y, Iwanaga Y, Kawamoto A, Narazaki M, Matsuda T, Adachi S, Takemura G, Kita T, Kimura T, Shioi T. Constitutive sirt1 overexpression impairs mitochondria and reduces cardiac function in mice. *Journal of molecular and cellular cardiology*. 2011;51:1026-1036
55. Dan L, Klimenkova O, Klimiankou M, Klusman JH, van den Heuvel-Eibrink MM, Reinhardt D, Welte K, Skokowa J. The role of sirtuin 2 activation by nicotinamide phosphoribosyltransferase in the aberrant proliferation and survival of myeloid leukemia cells. *Haematologica*. 2012;97:551-559
56. Narayan N, Lee IH, Borenstein R, Sun JH, Wong R, Tong G, Fergusson MM, Liu J, Rovira II, Cheng HL, Wang GH, Gucek M, Lombard D, Alt FW, Sack MN, Murphy E, Cao L, Finkel T. The nad-dependent deacetylase sirt2 is required for programmed necrosis. *Nature*. 2012;492:199-+
57. Wang S, Huang X, Sun DN, Xin XL, Pan QM, Peng SY, Liang ZJ, Luo C, Yang YM, Jiang HL, Huang M, Chai WG, Ding J, Geng MY. Extensive crosstalk between o-glcnaacylation and phosphorylation regulates akt signaling. *PLoS one*. 2012;7

58. Soesanto YA, Luo B, Jones D, Taylor R, Gabrielsen JS, Parker G, McClain DA. Regulation of akt signaling by o-glcnaC in euglycemia. *American journal of physiology. Endocrinology and metabolism*. 2008;295:E974-980
59. Vosseller K, Wells L, Lane MD, Hart GW. Elevated nucleocytoplasmic glycosylation by o-glcnaC results in insulin resistance associated with defects in akt activation in 3t3-l1 adipocytes. *Proceedings of the National Academy of Sciences of the United States of America*. 2002;99:5313-5318
60. Luo B, Soesanto Y, McClain DA. Protein modification by o-linked glcnaC reduces angiogenesis by inhibiting akt activity in endothelial cells. *Arteriosclerosis, thrombosis, and vascular biology*. 2008;28:651-657
61. Hu Y, Belke D, Suarez J, Swanson E, Clark R, Hoshijima M, Dillmann WH. Adenovirus-mediated overexpression of o-glcnaCase improves contractile function in the diabetic heart. *Circulation research*. 2005;96:1006-1013
62. Durgadoss L, Nidadavolu P, Valli RK, Saeed U, Mishra M, Seth P, Ravindranath V. Redox modification of akt mediated by the dopaminergic neurotoxin mptp, in mouse midbrain, leads to down-regulation of pakt. *FASEB journal : official publication of the Federation of American Societies for Experimental Biology*. 2012;26:1473-1483
63. Diotte NM, Xiong Y, Gao JP, Chua BHL, Ho YS. Attenuation of doxorubicin-induced cardiac injury by mitochondrial glutaredoxin 2. *Bba-Mol Cell Res*. 2009;1793:427-438
64. Adluri RS, Thirunavukkarasu M, Zhan LJ, Dunna NR, Akita Y, Selvaraju V, Otani H, Sanchez JA, Ho YS, Maulik N. Glutaredoxin-1 overexpression enhances neovascularization and diminishes ventricular remodeling in chronic myocardial infarction. *PloS one*. 2012;7
65. Malik G, Nagy N, Ho YS, Maulik N, Das DK. Role of glutaredoxin-1 in cardioprotection: An insight with glrx1 transgenic and knockout animals (retracted article. See vol. 53, pg. 745, 2012). *Journal of molecular and cellular cardiology*. 2008;44:261-269
